# Supplementary material for: Dynamics of Major Histocompatibility Complex Class I Association with the Human Peptide-loading Complex
Source: PubMed Central journal article supplement — J Biol Chem. 2012 Jul 24;287(37):31172–84. doi: 10.1074/jbc.M112.387704 (PMC3438949; doi:10.1074/jbc.m112.387704), 2012-07-24

**SUPPLEMENTAL FIGURE S1. MHC I occupancy of the PLC, but not the TAP:tapasin ratio, differs between human TAP- and rat TAP-expressing human cells.** *A*, rat TAP-expressing T2 digitonin lysate was sequentially immunoprecipitated with PaSta2, followed by a fifth immunoprecipitation with PaSta1 or PaSta2. After SDS-PAGE and immunoblotting with R.Gp48C (anti-tapasin), D90 (anti-rat TAP1), and 3B10.7 (anti-MHC I HC), the bands were quantitated. These results are expressed as the mean plus the standard error of two independent experiments. *White bars*, tapasin-ERp57. *Gray bars*, TAP1. *Black bars*, MHC I HC. *B* and *C*, human TAP- and rat TAP-expressing T2 cells were fixed in formaldehyde, permeabilized in saponin, and labeled with PaSta1, PaSta2, or either the anti-human TAP1 antibody 148.3 or the anti-rat TAP1 antibody D90 and AlexaFluor647-coupled goat anti-mouse or anti-rabbit IgG prior to intracellular flow cytometry analysis. A negative control, labeled only with secondary antibody, was also included. The ratio of *B*, PaSta2:PaSta1 or *C*, anti-TAP1:PaSta1 binding following background subtraction was then calculated. These results are expressed as the mean plus the standard error of two independent experiments.

# Supplemental Figure S1

**A**

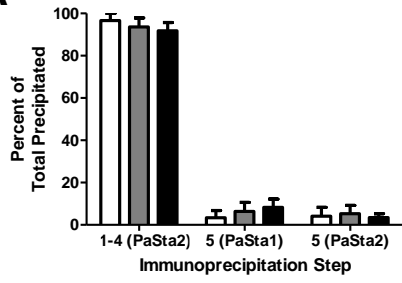

**B**

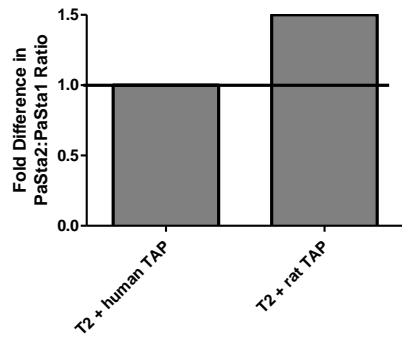

**C**

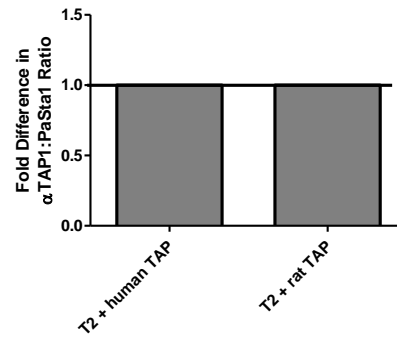

Supplement: supp_M112.387704_jbc.M112.387704-1.pdf [file supp_M112.387704_jbc.M112.387704-1.pdf]
